# Impact of anaesthesia on static and dynamic functional connectivity in mice

Tomokazu Tsurugizawa<sup>1,2\*</sup> and Daisuke Yoshimaru<sup>2,3</sup>

<sup>1</sup>Human Informatics and Interaction Research Institute, National Institute of Advanced Industrial Science and Technology, 1-1-1 Umezono, Tsukuba-City, Ibaraki 305-8568, Japan

<sup>2</sup>Jikei University School of Medicine, 3-25-8 Nishishinbashi, Minato City, Tokyo 105-8461, Japan

<sup>3</sup>Riken, 2-1 Hirosawa, Wako, Saitama, 351-0198, Japan

\*Co-corresponding author:

Tomokazu Tsurugizawa

Human Informatics and Interaction Research Institute, National Institute of Advanced Industrial Science and Technology, 1-1-1 Umezono, Tsukuba-City, Ibaraki 305-8568, Japan

tsurugizawa@gmail.com

## Keywords:

**Functional connectivity; Dynamic; Mouse; Resting state; MRI**

## Abbreviations:

ACC, anterior cingulate cortex; Aid, dorsal agulanular insular cortex; AIp, posterior agulanular insular cortex; AUDd; dorsal auditory cortex; AUDp, primary auditory cortex; AUD-VIS, auditory-visual cortical network; BOLD, blood oxygenation level dependent; CEA, central amygdala; CM, centromedian nucleus; DMN, default mode network; DMH, dorsomedial hypothalamus; ECT, ectorhinal area; ENTDL, dorsolateral entorhinal cortex; FC, functional connectivity; FD, Framewise displacement; FDR, false discovery rate; GU, gustatory cortex; Hypo, hypothalamic network; ICA, independent component analysis; Iso, isoflurane; LA, lateral amygdala; LASSO, least absolute shrinkage and selection operator; LCN, lateral cortical network; LHA, lateral hypothalamus; LN, limbic network; LSr, lateral septal nucleus; Med, medetomidine; MO(s), (secondary) motor cortex; MPO, medial preoptic area; MSE, minimum mean squared error; NBS, network based statistic; PAG, periaqueductal tract; PH, posterior hypothalamus; PHd, dorsolateral posterior hypothalamus; PIR, piriform cortex; PO, posterior complex; POA, preoptic area; SSs, secondary somatosensory cortex; Tea, temporal association area; ThN, thalamus; VAL, ventral anterior-lateral complex; VM, ventral medial nucleus; VPL, ventral posterolateral nucleus; VPM, ventral posteromedial nucleus;

1 **Abstract**

2 A few studies have compared the static functional connectivity between awake and anaesthetized states in  
3 rodents by resting-state fMRI. However, impact of anaesthesia on static and dynamic fluctuations in  
4 functional connectivity has not been fully understood. Here, we developed a resting-state fMRI protocol to  
5 perform awake and anaesthetized functional MRI in the same mice. Static functional connectivity showed a  
6 widespread decrease under anaesthesia, such as when under isoflurane or a mixture of isoflurane and  
7 medetomidine. Several interhemispheric connections were key connections for anaesthetized condition from  
8 awake. Dynamic functional connectivity demonstrates the shift from frequent broad connections across the  
9 cortex, the hypothalamus, and the auditory-visual cortex to frequent local connections within the cortex only.  
10 Fractional amplitude of low frequency fluctuation in the thalamic nuclei decreased under both anaesthesia.  
11 These results indicate that typical anaesthetics for functional MRI alters the spatiotemporal profile of the  
12 dynamic brain network in subcortical regions, including the thalamic nuclei and limbic system.

13

14 **Highlights**

- 15 • Resting-state fMRI was compared between awake and anaesthetized in the same mice.  
16 • Anaesthesia induced a widespread decrease of static functional connectivity.  
17 • Anaesthesia strengthened local connections within the cortex.  
18 • fALFF in the thalamus was decreased by anaesthesia.

19

20

## 1 **Introduction**

2           The effect of anaesthetics on the brain functional network has interested researchers for decades.  
3 Functional connectivity (FC), which reflects the synchronization of fluctuation of blood oxygenation  
4 level-dependent (BOLD) signals accompanying neuronal activity among anatomically separated brain  
5 regions<sup>1</sup>, could be a key structure between awake and anaesthetized states<sup>2</sup>. A common assumption is that  
6 FC does not change over the data acquisition period, which is generally between 5 and 20 min, and therefore,  
7 static FC has been computed from the time course of BOLD signal throughout the acquisition time. Previous  
8 studies have shown that static FC is widely decreased by anaesthesia in humans<sup>3,4</sup> and in monkeys<sup>5</sup>,  
9 depending on the agent, dose, and target functional network. Rodent models are promising for deeply  
10 understanding the effect of anaesthesia on FC, and recent progress in fMRI has enabled the investigation of  
11 resting-state functional connectivity in awake mouse<sup>6,7,8</sup>, as well as rats<sup>9,10</sup>. Awake mouse fMRI data  
12 indicates that connectivity strength is significantly decreased in widespread brain regions under anaesthesia  
13<sup>11,12,13</sup>, but the structure of functional connectivity between awake and anaesthetized animals is similar<sup>14</sup>.

14           Although static FC studies reflect the synchronization of neuronal activity, FC is not absolutely  
15 stationary in nature during acquisition. This concept of dynamic fluctuation of functional connectivity, which  
16 is called dynamic functional connectivity (dynamic FC), has emerged in the last 10 years<sup>15</sup>. Dynamic FC is  
17 altered in psychiatric disease patients<sup>16,17,18</sup>, and recent studies have shown the modulation of dynamic FC  
18 by anaesthetics in macaque models<sup>5</sup>. The dominating functional configurations have low information  
19 capacity and lack negative correlations under anaesthesia, and conversely, dynamical exploration of a rich,  
20 flexible repertoire of functional configurations in awake state<sup>19</sup>. A rodent study has also shown that  
21 isoflurane (Iso)-anaesthesia profoundly impacted the dynamic FC of neural circuits subserving cognitive and  
22 emotional functions by investigating the FC correlated to the seed regions of the infralimbic cortex and  
23 somatosensory cortex<sup>20</sup>. However, the effect of anaesthesia on the dynamic properties of other functional  
24 networks, such as default mode network (DMN) and cortical network, is not known.

25           In the current study, we aimed to investigate the differences in static and dynamic functional  
26 connectivity under anaesthesia and in the awake state. For this purpose, we successfully induced anaesthesia  
27 in awake mice in a magnetic bore. This enabled us to compare the awake state and anaesthetized state in the  
28 same group directly. Two commonly used anaesthesia protocols for fMRI, a low dose of Iso and a mixture of  
29 low doses of Iso and medetomidine (Med), were used in this study. Furthermore, fractional amplitude of low  
30 frequency fluctuation (fALFF) was investigated to assess the alteration of the amplitude of neuronal activity  
31 at the voxel level<sup>21</sup>.

## 32 **Method**

### 33 **Animals and surgery**

34 We used 27 male C576J/BL mice (18 - 25 g), allocated to 9 Iso group, 9 Iso + Med group, and 9 test-retest  
35 reproducibility group. All animal procedures used in the present study were approved by the *Ethical*  
36 *Committee for Animal Experiments (Comité d'Ethique en Expérimentation Animale, Commissariat à*  
37 *l'Énergie Atomique et aux Énergies Alternatives, Direction des Sciences du Vivant, Fontenay-aux-Roses,*

1 France). All methods in this study were performed in accordance with the relevant guidelines and  
2 regulations.

### 3 4 **Surgery for awake fMRI**

5 We performed cranioplasty on the mice under isoflurane anaesthesia (1.5% with air) for awake fMRI<sup>22</sup>. The  
6 skin of the head of the mice was cut longitudinally, and the skull surface was exposed and polished using  
7 saline and gauze. We applied resin cement (Super-Bond C&B, Sun Medical Company, Ltd., Shiga, Japan) on  
8 the surface of the skull. Then, a cranioplastic acrylic head bar ( $3 \times 3 \times 27 \text{ mm}^3$ ), which was used for head  
9 fixation without pain during the imaging session, was attached to the skull horizontally with resin cement  
10 (Unifast TRAD, GC Corporation, Tokyo, Japan). Following surgery, the mice were allowed to recover for  
11 more than 1 week (Fig. 1).

12  
13 (Fig. 1)

### 14 15 **fMRI acclimation training**

16 During surgery recovery, mice were allowed to become accustomed to the cupped handling method<sup>7,23</sup>. We  
17 confirmed that mice did not urinate and did not jump from the cupped hands during handling before  
18 acclimation training. The mice were trained for 4-6 days to become accustomed to the fMRI conditions.  
19 During the first 2 days, a pseudo-MRI system was used. The mice were anaesthetized by 1.5% isoflurane for  
20 maintenance while positioning them on the pseudo-MRI apparatus. Mice remained in the pseudo-MRI  
21 apparatus for 30 min on the first day and 90 min on the second day. The respiratory rate of the mice was  
22 monitored during the training sessions. For the next 2-4 days, mice were placed on an MRI bed with a head  
23 fixation system with the same methods as the fMRI experiment (see the awake fMRI section for details  
24 about awake fMRI procedure). Throughout the training period, the respiration rate and body weight were  
25 confirmed to be in the normal range using an MR-compatible monitoring system (model 1025; SA  
26 Instruments, Stony Brook, NY, USA).

### 27 28 **Awake and anaesthetized fMRI**

29 All MRI experiments were performed with a Bruker 11.7 T MRI system with a cryoprobe (Bruker BioSpin,  
30 Ettlingen, Germany). The homemade head fixation system was placed on the mouse bed for cryoprobe<sup>22</sup>.  
31 The mice were anaesthetized by 2% isoflurane with air for induction and less than 1.5% with air for  
32 maintenance during head fixation and adjustment of the magnetic homogeneity, shimming and reference  
33 pulse. The schematic figure of anaesthesia system is shown in Fig. 1A. Iso was administered for no more  
34 than 10 min. The anaesthesia was stopped and structural image scan started. The mice awoke during 10 min  
35 recovery period. We confirmed that the respiration rate increased over 150 breaths/min during the recovery  
36 period. Previous study showed that neuronal activity recovered to that of a conscious state at 10 min after  
37 cessation of Iso delivery<sup>7</sup>. The fMRI acquisition started at that point. The schematic paradigm of the MRI  
38 protocol is illustrated in Fig. 1B. When mice awakened from anaesthesia after the recovery period, awake

1 resting-state fMRI was acquired. Once awake fMRI was complete, anaesthesia was induced. In the Iso group,  
2 1.5% isoflurane with air was delivered for the induction of anaesthesia through the tube (Fig. 1A). When  
3 respiration was decreased to less than 100/min, isoflurane was reduced to 0.8%. fMRI scanning started 30  
4 min after isoflurane induction was initiated. For the Iso + Med group, 1.5% isoflurane with air was delivered  
5 for the induction of anaesthesia. When the respiration rate decreased to less than 100/min, a bolus of  
6 medetomidine (0.1 mg/kg body weight, s.c.) was injected through the infusion canula, which was inserted  
7 under the skin on the animals' back, and then it was infused continuously at a rate of 0.05 mg/kg body  
8 weight/h (s.c.). Isoflurane was reduced to 0.5% when the respiratory rate was reduced to less than 100/min.  
9 The resting state fMRI images were acquired using a T2\*-weighted multi-slice gradient-echo EPI sequence  
10 with the following parameters: TR/TE = 1500/14 ms, spatial resolution = 100 x 100 x 500  $\mu\text{m}^3$ /voxel, 15  
11 slices and 400 volumes (total 10 min). For normalization in image processing, the structural image with the  
12 same field of view as the fMRI was acquired using T2-weighted multi-slice rapid acquisition with relaxation  
13 enhancement (RARE) with the following parameters: TR = 2,500 ms, effective TE = 13 ms, spatial  
14 resolution = 100 x 100 x 500  $\mu\text{m}^3$ , RARE factor = 4, and 4 averages.

15

### 16 **Image preprocessing**

17 Statistical parametric mapping SPM12 software (Wellcome Trust Center for Neuroimaging, UK) was used to  
18 analyse the fMRI data and to perform preprocessing steps, including slice timing correction, motion  
19 correction by realignment, normalization and smoothing with a Gaussian filter (0.3 x 0.3 mm<sup>2</sup> in each slice).  
20 Before preprocessing, template images co-registered to the Allen mouse brain atlas were obtained  
21 (<http://atlas.brain-map.org/>). Functional and structural images were normalized to these template images.  
22 Framewise displacement (FD) was used to check head motion<sup>24</sup>. FD was calculated using 6 motion  
23 parameters (3 for translation and 3 for rotation) from realignment in SPM. For all subjects, it was confirmed  
24 that the head motion was less than the following criteria: (1) mean FD averaged for all time points during the  
25 scan was less than 0.02 mm and (2) FDs at all time points were less than 0.05 mm. Mean FD was not  
26 significantly different between groups. The linear trend in the time course of the fMRI dataset was removed  
27 voxel-by-voxel using the CONN toolbox (<https://web.conn-toolbox.org/>)<sup>25</sup>. Mean signals in the ventricles  
28 and white matter and six motion parameters of an object (translational and rotational motions) were  
29 regressed out from the time series of each voxel to reduce the contribution of physiological noise, such as  
30 respiration and head movement.

31

### 32 **Static functional connectivity**

33 The preprocessed fMRI data were then detrended, and slow periodic fluctuations were extracted using a  
34 bandpass filter (0.01–0.08 Hz). A total of 142 regions of interest (ROIs, 71 per hemisphere) were delineated  
35 based on the template images, with reference to the Allen mouse brain atlas  
36 (<https://scalablebrainatlas.incf.org/mouse/ABA12>). The correlation coefficients between two ROIs were  
37 calculated using the CONN toolbox. The statistical significance of ROI-ROI connectivity was assessed by  
38 paired t-test or two sample t-test with a threshold of  $p < 0.05$  (NBS-corrected), using the Network-Based

1   Statistic toolbox (<https://www.nitrc.org/projects/nbs/>). The connections with a Cohen's d value exceeding 0.7  
2   (minimum meaningful effect size) were further assessed for NBS. Subnetworks were then identified in the  
3   set of supra-threshold connections. The size of each subnetwork was measured in terms of the number of  
4   connections it comprised. Permutation testing was used to compute a family-wise error-corrected p-value for  
5   each subnetwork. Specifically, 5000 permutations were generated in which group labels were randomly  
6   permuted and the size of the largest subnetwork was recorded for each permutation. Subnetworks deemed to  
7   be significant with permutation testing ( $p < 0.05$ , family-wise error corrected) were identified as significant.

## 8 9   **Feature extraction**

10   The feature extraction of alterations of functional connectivity was computed using MATLAB (MathWorks,  
11   Natick, USA). The least absolute shrinkage and selection operator (LASSO) method, which is suitable for  
12   the reduction of high-dimensional data, was used to select the significant features from the Pearson's  
13   correlation coefficient data (10011 data sets) of regionally averaged fMRI time series obtained between all  
14   142 brain regions. LASSO is a penalization method that shrinks all regression coefficients and sets the  
15   coefficients of many unrelated features that have no discriminatory power between the classes exactly to zero  
16   with the regulation parameter  $\lambda$ <sup>26,27</sup>. The regulation parameter  $\lambda$  tuned the sparsity of the model such that a  
17   larger  $\lambda$  would lead to a sparser model. We then selected the optimal  $\lambda$  in the LASSO model by using  
18   leave-one-out cross-validation via MSE plus one standard deviation of the MSE.

## 19 20   **The similarity of Functional Brain Connectivity**

21   The differences among groups, individuals, and states of anaesthesia were directly examined by calculating  
22   the similarity among each original functional connectivity using MATLAB<sup>28,29</sup>. The similarity matrix was  
23   created by calculating Fisher's z-transformed correlation between the linearized original connectivity  
24   matrices of each individual. This similarity matrix represents the awake group ( $n = 9$ ) in the first third, the  
25   Iso group ( $n = 9$ ) in the next third, and the Iso + Med group ( $n = 9$ ) in the last third.

## 26 27   **Independent component analysis**

28   Preprocessed fMRI data were analysed in the SPM Group ICA of fMRI Toolbox (GIFT v3.0b  
29   <http://trendscentre.org/software/gift/>). First, all data sets underwent a subject-specific principal component  
30   analysis (PCA), which estimated 150 components. All subjects' reduced data sets were then concatenated  
31   and underwent a PCA that estimated 40 components at the group level. Subsequently, group-level spatial  
32   ICA was performed on the PCA output, identifying 40 functional components. The Infomax algorithm was  
33   used for component estimation. Subject-specific component maps and time courses were obtained from the  
34   group-level components using the GICA back reconstruction method. Using component spatial maps that we  
35   computed before<sup>7</sup>, 27 components were finally identified as functional components. These components were  
36   the default mode network (DMN), including the retrosplenial cortex and the cingulate cortex (3 ICs); lateral  
37   cortical network (LCN), including the sensorimotor cortex (8 ICs); subcortical basal ganglion network (BG),  
38   including the striatum and the nucleus accumbens (2 ICs); hippocampus (Hip) (3 ICs); thalamic network (2

1 ICs); hypothalamus (Hypo) (4 ICs); and auditory-visual network (AUD-VIS), including the auditory and  
2 visual cortex (5 ICs).

### 3 4 **Dynamic FC**

5 Dynamic FC was conducted with the GIFT Dynamic FNC Toolbox (v1.0a). We used time windows of 45 s  
6 (30 TRs) and steps of 1.5 s (1 TR). The time series was convolved with a Gaussian of  $\sigma = 3$  TRs. For  
7 each window, FC was estimated in the form of a regularized inverse covariance matrix using the Toolbox  
8 graphical LASSO method with an additional L1 norm constraint. The estimated covariances were  
9 transformed to Fisher-Z. To identify FC states that reoccurred across time and across subjects, the windowed  
10 FC matrices were subjected to the GIFT k-means clustering procedure. In the first step, a subset of windows  
11 (i.e., “exemplars”) was selected for each subject, representing those FC matrices with maximal variability in  
12 FC. From those windows, the optimal number of clusters (k) was determined by the toolbox using the elbow  
13 criterion, defined as the ratio of within-cluster distances to between-cluster distances. The resulting k cluster  
14 centroids were used as templates for clustering all windows’ FC matrices of all subjects. The dwell time of  
15 state was measured as the frequency of unchanged between time window and time+1 window, and the  
16 frequency of occurrence was measured as the number of windows in each state.

### 17 18 **Fractional amplitude of low frequency fluctuation**

19 The fALFF was defined as the ratio of power within the frequency range between 0.01 and 0.08 Hz and  
20 power over the total frequency range in each voxel<sup>21, 30</sup>. The fALFF maps were then compared, and  
21 significant differences between groups were tested voxel-by-voxel using paired t-tests or two-sample t-tests  
22 with standard progressive matrices with a threshold of  $p < 0.05$  (false discovery rate (FDR) at the cluster  
23 level).

## 24 25 26 27 **Results**

### 28 **Widespread reduction of static FC under each anaesthesia condition compared to the FC in the awake** 29 **state**

30 First, we investigated static FCs in awake, Iso anaesthetized and Iso + Med anaesthetized conditions. To  
31 compare awake and anaesthetized state directly, we developed the protocol to induce anaesthesia in awake  
32 mouse within MR bore (Fig. 1). Iso-anaesthesia was induced via the tube placed in front of the nose and Med  
33 was injected through the catheter under the back skin (Fig. 1A). Because the head space among the head  
34 fixation system, the mouse bed, and the cryoprobe is small enough to accumulate Iso, mice were  
35 anaesthetized in a few minutes following the start of Iso anaesthesia. The head fixation system described in  
36 the previous article was used in this study<sup>22</sup>. We confirmed that mouse was anaesthetized when the  
37 respiratory rate was decreased from 150-200 beat/min<sup>7</sup>, to less than 100 beat/min. To provide a whole-brain  
38 characterization of static FC, the whole brain was parcellated into 142 broad regions, and the Pearson

1 correlation coefficient was calculated between pairs of regionally averaged fMRI time series to yield a  $142 \times$   
2  $142$  connectivity matrix in each mouse. The static FCs under Iso anaesthesia and Iso + Med anaesthesia  
3 conditions were widely decreased compared with those in the awake state (Fig. 2A). We noted that the  
4 typical functional structure of high interhemispheric connectivity (e.g., connectivity between the left  
5 sensorimotor cortex and right sensorimotor cortex) and the local network (e.g., within the sensorimotor  
6 cortex) was observed under Iso and Iso + Med anaesthesia conditions as well as in the awake state. To  
7 evaluate the reproducibility of awake fMRI, test-retest reproducibility was assessed. Awake fMRI was  
8 performed on two separate days, and static FCs were compared between the first and second days. There was  
9 no significant difference in static FC between 1st day and 2nd day (Supplementary Figs. 1A and 1B). These  
10 results and those of our previous study of awake fMRI<sup>7</sup> indicate excellent test-retest reproducibility. The  
11 network-based statistic (NBS)<sup>31</sup> was used to detect significant differences in functional connectivity strength  
12 in the pairs of brain regions between the awake and Iso-anaesthetized states and between the awake and Iso +  
13 Med anaesthetized states while controlling the familywise error rate. The statistical analysis shows  
14 widespread hypoconnectivity under Iso anaesthesia (Fig. 2B) and under Iso + Med anaesthesia (Fig. 2C). We  
15 did not observe a significant difference in static FC in pairs of regions between Iso and Iso + Med  
16 anaesthesia with an NBS-corrected significance level of  $p < 0.05$  (Supplementary Fig. 1C). Independent  
17 component analysis (ICA) was used to investigate the typical network defined by previous studies in each  
18 state. We found that DMN, lateral cortical network (LCN), subcortical basal ganglion network (BG),  
19 hippocampus (Hip), thalamus (ThN), hypothalamic network (Hypo) and auditory-visual cortical network  
20 (AUD-VIS) were part of the network involved in awake, Iso anaesthetized and Iso + Med anaesthetized  
21 states (Supplementary Fig. 2).

22  
23 (Figure 2)

24  
25 We then investigated the similarity of static FC across all subjects in each condition (Fig. 3). High similarity  
26 was observed in the awake condition, whereas lower similarity was observed under both Iso and Iso + Med  
27 anaesthesia, indicating the robustness of the functional connectivity in the awake state and probably due to  
28 the reduction of the FC in the anaesthetized states. According to the similar static FC between Iso and Iso +  
29 Med anaesthesia, the anaesthetized state was defined as the combination of Iso and Iso + Med anaesthetized  
30 states for further static FC analysis.

31  
32 (Figure 3)

### 33 34 **Key nodes of widespread reduction of static FC under anaesthesia**

35 Next, we tried to identify the key regions for widespread reduction of static FC under anaesthesia so that  
36 fMRI data under Iso and Iso + Med anaesthetized states were combined and evaluated as the anaesthesia  
37 group. Static FC under the anaesthetized state showed widespread hypoconnectivity compared to the FC in  
38 the awake state (Fig. 4A). The pairs of connections (a total of  $142 \times 141/2 = 10,011$  connections) were then



1 sequenced according to effect size (Cohen's  $d$ ), which was calculated from  $t$ -values (Fig. 4A). The top  
2 twenty connections (Cohen's  $d > 1.0$ ) demonstrated decreased static FC in the interhemispheric  
3 periaqueductal grey (PAG), anterior cingulate cortex (ACC), lateral septal nucleus (LSr), dorsomedial  
4 hypothalamus (DMH), (dorsal) posterior hypothalamus (PH, PHd), lateral hypothalamic area (LHA),  
5 secondary motor cortex (MOs), and dorsal agranular insular cortex (AId) (Fig. 4B). These results indicate  
6 that a significant reduction in interhemispheric connections in the whole brain could be a key connection  
7 under anaesthetization. Extensive reductions in connectivity strength according to effect size were observed  
8 in the whole brain, thalamic nuclei (ventral anterior-lateral complex (VAL), ventral posteromedial nucleus  
9 (VPM), ventral posterolateral nucleus (VPL), posterior complex (PO), centromedian nucleus (CM), ventral  
10 medial nucleus (VM)), limbic system (CA3 of hippocampal regions, LSr, lateral amygdala (LA) and central  
11 amygdala (CEA)), hypothalamus (LHA, medial preoptic area (MPO)), cortex (dorsal agranular insular cortex  
12 (AId), posterior agranular insular cortex (AIP), gustatory cortex (GU), secondary somatosensory cortex (SSs),  
13 dorsolateral entorhinal cortex (ENTDL), perirhinal cortex (PRh), piriform cortex (PIR), and anterior  
14 cingulate cortex (ACC)) (Fig. 4C). Then, we estimated the features of anaesthesia compared with those of  
15 the awake state. Based on the least absolute shrinkage and selection operator (LASSO) logistic regression  
16 model, the  $\lambda$  value that had the minimum mean squared error (MSE) was chosen as the optimal regulation  
17 parameter ( $\lambda = 0.1126$ ), and 10 features with significant predictive power were selected using the regulation  
18 parameter from among all 10011 features (Figs. 4D and 4E).

19

20 (Figure 4)

21

22 In the correlation coefficient of selected features, all 10 features showed a significant reduction in correlation  
23 coefficients under anaesthesia compared to those in the awake state (Table 1). In accordance with the  
24 considerable effect size, interhemispheric connectivity in the anterior cingulate cortex and dorsomedial  
25 hypothalamus was extracted as a key feature. Additionally, a decrease in interhemispheric connectivity in the  
26 dorsolateral entorhinal cortex and lateral amygdala, which showed between medium (between 0.5 and 0.8)  
27 and large effect sizes (greater than 0.8), was observed. It should be noted that eight of ten features estimated  
28 from LASSO showed medium or large effect sizes, although some were not included in the top 20 ranking of  
29 Cohen's  $d$  (Fig. 4B). The connectivity between the left gustatory area and VPL and between the left CA3 and  
30 right temporal association area showed small effect sizes, which were between 0.2 and 0.4.

31

32 (Table 1)

33

#### 34 **Differences in dynamic FC under awake, Iso and Iso + Med anesthetized conditions.**

35 Dynamic FC was then investigated in the awake, Iso, and Iso + Med anesthetized conditions. K-means clustering  
36 identified four distinct connectivity states based on the windowed FC matrices (Fig. 5A). State 1 was characterized  
37 by strong positive and negative FC within the LCN. State 2 was characterized by widespread positive and negative  
38 FC. State 3 was characterized by overall weak FC. State 4 was characterized by dominant positive FC within the

1 LCN, Hypo and AUD-VIS and negative FC between the LCN and Hypo. The dwell time window was between 9 and  
2 100 in the awake state (Fig. 5B). The dwell time window of state 1 significantly increased under Iso + Med  
3 anaesthesia compared to that of the awake state, whereas the dwell time window under Iso anaesthesia increased  
4 from that of the awake state but not significantly ( $5.56 \pm 3.13$  for awake state,  $26.34 \pm 9.61$  for Iso and  $144.86 \pm$   
5  $44.63$  for Iso + Med). In contrast, the dwell time window in state 4 under Iso and Iso + Med anaesthesia significantly  
6 decreased compared to that of the awake state ( $33.19 \pm 10.55$  for awake state,  $4.59 \pm 2.62$  for Iso and no dwell time  
7 was found for Iso + Med). The frequency of occurrence in state 1 increased under Iso ( $0.27 \pm 0.09$ ) and Iso + Med  
8 anaesthesia ( $0.75 \pm 0.10$ ) compared to that of the awake state ( $0.03 \pm 0.02$ ), whereas the frequency of occurrence in  
9 state 4 was decreased under Iso ( $0.02 \pm 0.02$  for state 4) and Iso + Med (no occurrence was observed for state 4)  
10 anaesthesia compared to that of the awake state ( $0.30 \pm 0.10$ ) (Fig. 5C). Together with the dwell time results, this  
11 finding indicates that the anaesthetized state is characterized by the shift of dynamic FC from state 4 to state 1.

12

13 (Figure 5)

14

#### 15 **Alterations in fALFF under Iso and Iso + Med anaesthesia compared with the awake state.**

16 We compared fALFF between awake and anaesthetized states. The fALFF in the medial part of the thalamus, such as  
17 the CM, significantly decreased under Iso anaesthesia, while the fALFF in the hypothalamus increased under Iso  
18 anaesthesia (Fig. 6A). Iso + Med anaesthesia significantly decreased fALFF in several thalamic nuclei, including the  
19 CM and VPM/VPL (Fig. 6B). The fALFF in the cortex, including the anterior cingulate cortex (ACC), primary  
20 somatosensory cortex (SSp), auditory cortex (AUD), and entorhinal cortex (ENT), and the hypothalamus, including  
21 the medial preoptic area (MPO) and ventromedial nucleus (VMH), significantly increased under Iso + Med  
22 anaesthesia compared with the awake state (Fig. 6B). There was no significant difference in fALFF between Iso and  
23 Iso + Med anaesthesia except for a small spot of left SC (Supplementary Fig. 3A). We also compared fALFF  
24 between awake and anaesthetized (combining Iso and Iso + Med) states (Fig. 6C). fALFF in the thalamic nuclei,  
25 including the CM and VPM, was significantly decreased, and fALFF in the cortex, including the motor cortex,  
26 somatosensory cortex, auditory cortex and entorhinal cortex, and the hypothalamus was increased under  
27 anaesthetization. The test-retest reproducibility in fALFF in awake mice was assessed. There was no significant  
28 change in fALFF between the first and second scans except for the small area showing an increase in the cortex in  
29 the second scan (Supplementary Fig. 3B). Together with the static FC results (Supplementary Fig. 1), awake fMRI  
30 shows excellent reproducibility.

31

32 (Figure 6)

33

#### 34 **Discussion**

35 In this study, we investigated the alteration of static and dynamic functional connectivity in awake state and  
36 anaesthetized state in the same animals. Most previous studies compared the anaesthetized state and awake  
37 state in different animal groups, which were scanned on different days. We successfully conducted the  
38 awake-anaesthesia fMRI protocol to identify shift in the functional network from awake to anaesthesia.

1 Remarkably, awake fMRI will reduce the number of animals, suggesting the contribution to the 3R for  
2 animal experiment. Furthermore, dynamic functional connectivity indicates that dynamic FC shifted from  
3 positive and negative connectivity across LCN, Hypo and AUD-VIS (state 4 in Fig. 5) to dominant  
4 connectivity in the LCN (state 1 in Fig. 5). Static FC demonstrates a reduction in interhemispheric  
5 connectivity as well as in the subcortical network. Together, reduction of the FC in the subcortex, including  
6 the thalamic nuclei, limbic system and hypothalamus, is a key feature for the anaesthetized state.

### 7 8 **Awake fMRI and anaesthetized fMRI**

9 Previous studies used different mouse groups to compare the effect of anaesthetics on static FC<sup>9, 10, 11</sup>.  
10 Because resting-state FC architecture has individual variability<sup>29</sup>, direct comparison of anaesthesia in the  
11 same animal could directly demonstrate FC in awake and anaesthetized states without individual variation  
12 confounding the results. The similarity across the subjects showed robust static FC in the awake state,  
13 whereas the anaesthetized state showed lower similarity. It is opposite to our presumption that animals would  
14 exhibit uniform FC under anaesthesia, but it is explained by that residue of physiological noise could be  
15 more effective on weak FC under anaesthesia. The current study also showed a similar reduction in static FC  
16 between Iso and Iso + Med. This is in contrast to previous studies showing robust reduction of static FC  
17 under Iso anaesthesia rather than Iso + Med anaesthesia<sup>11, 12</sup>. Generally, Iso suppresses neurovascular  
18 coupling<sup>32</sup> and astrocyte activity as well as neuronal activity in a dose-dependent manner<sup>33, 34</sup>. Our previous  
19 study also demonstrated that the Iso dose-dependently influenced the relationship between spontaneous  
20 neuronal activity and BOLD signals<sup>35</sup>. A static FC study revealed that Iso dose-dependently induces a  
21 widespread reduction in static FC<sup>36</sup>. Paasonen *et al* used 1.3% Iso for the Iso group and 0.06 mg/kg/h MED  
22 and 0.5–0.6% ISO for the Iso + Med group<sup>11</sup>. They reported lowed static FC under Iso anaesthesia because  
23 higher dosage of Iso was used. Here, we used 0.8% and 0.5% Iso, which was enough to observe spontaneous  
24 neuronal activity and BOLD fluctuation, for Iso and Iso + Med anaesthesia condition respectively. This low  
25 dose of Iso did not matter for static FC. Importantly, dynamic FC and fALFF showed distinct changes  
26 between Iso and Iso + Med anaesthesia. As described below, Med itself modulates neuronal activity through  
27  $\alpha$ 2-adrenoreceptors, which indicates that dynamic FC and fALFF are more sensitive to the modulation of  
28 neuronal activity and temporal synchronization between neurons affected by Med.

### 29 30 **Static and dynamic functional connectivity**

31 In this study, a comparison was made between awake and anaesthetized conditions using static FC and  
32 dynamic FC measures. We observed a widespread reduction in static FC, and interhemispheric connectivity  
33 was reduced both under Iso and Iso + Med anaesthesia, consistent with a previous study<sup>11, 37</sup>. Subcortical  
34 regions, including the agranular insular cortex, thalamic nuclei and a part of the limbic system, are mostly  
35 included in the reduction of static FC. These results are consistent with previous studies in humans showing  
36 that static FC of the thalamus preferentially decreased under propofol and dexmedetomidine anaesthesia in  
37 humans<sup>4, 38, 39</sup>. The anterior insular cortex is an informational hub in the global network related to  
38 consciousness<sup>40</sup>. Previous rodent studies compared static FC between awake and anaesthetized states<sup>11, 37</sup>,

1 but the ROI size was too large to investigate the subnucleus level. Our static FC study, therefore, provides  
2 the first evidence that investigated different brain networks between the awake state and anaesthetized state  
3 in detail. High-resolution fMRI showed that several nuclei of the thalamus were part of key connections in  
4 the anaesthetized state (Fig. 3). In addition to comparing static FC between the awake and anaesthetized  
5 groups, we used LASSO, which is a linear regression technique enforcing sparsity on its weights, to extract  
6 key connectivity by machine learning. Sparsity has an advantage that creates interpretable results by  
7 selecting a small number of important features. We found several key connections from those that showed  
8 large Cohen's  $d$  values. This indicates the feasibility of LASSO to extract the essential FC for alteration of  
9 brain network from all connections that had moderate-large effect size. However, very few connections that  
10 showed small effect sizes were estimated as key features by LASSO. We should carefully assess the LASSO  
11 results to validate the key structure.

12 Dynamic FC offers an advantage in assessing dynamic functional network because connectivity is  
13 not stable during measurements. In addition to this advantage, dynamic FC is useful to investigate brain  
14 connectivity of individuals<sup>41</sup>. We observed functional networks such as the DMN, LCN, BG, AUD-VIS, Hip,  
15 ThN and Hypo, which are commonly identified in rodent ICA studies<sup>12, 42</sup>. The dynamic FC study  
16 demonstrated that the frequency of occurrence within the LCN (state 1) increased under anaesthesia, and  
17 instead, interaction within the LCN, Hypo and VIS-AUD (state 4) decreased. We inferred that a reduction in  
18 connectivity strength in the subcortical regions could be related to reduction of the dynamic interaction of the  
19 global functional network. Remarkably, Iso + Med group significantly reduced weak global interaction (state  
20 3) rather than Iso group, indicating mixture of Iso and Med induced more significant reduction of global  
21 network than Iso only. These results indicate that the switching of the frequency of occurrence between local  
22 and distant networks is the key mechanism underlying shifts between awake and anaesthetized states.

23

#### 24 **fALFF increase and neuronal activity**

25 The fALFF in the medial nuclei of the thalamus, including the centromedian nuclei, was significantly  
26 decreased under Iso and Iso + Med anaesthesia (Fig. 5). This corresponds to our previous study showing that  
27 the activity of the centromedian nuclei of the thalamus is related to the arousal state in rats<sup>43</sup>. In a previous  
28 study, we clearly showed that the apparent diffusion coefficient, which was calculated from diffusion MRI  
29 signals, was related to neuronal activity. The ADC as well as the local field potential in the CM depends on  
30 the arousal level. Here, in addition to ADC, we showed that fALFF is another method to track the neuronal  
31 activity. Indeed, we showed that fALFF was correlated to neuronal activity in mice<sup>21, 30</sup>. Importantly,  
32 because fALFF can be computed with the same data set for FC, it is possible to compare fALFF and FC  
33 directly in the same group. The simultaneous measurement of neuronal activity by means of fALFF and  
34 synchronization of neuronal oscillation between anatomically separated regions will provide insights into  
35 what happens in the resting state during anaesthesia. In addition to the reduction in fALFF in the medial part  
36 of the thalamus, Iso + Med reduced fALFF in the lateral part of the hypothalamus. Iso suppresses neuronal  
37 activity in the CM<sup>44</sup>, and medetomidine suppresses neuronal activity in the thalamus through the  
38  $\alpha 2$ -adrenoreceptor, which is abundantly distributed in the thalamus<sup>45, 46</sup>. The mixed administration of Iso and

1 Med therefore induces a stronger and broader reduction in neuronal activity in the thalamus than Iso alone.  
2 An [18F] FDG-PET study revealed an increase in glucose metabolism in the hypothalamus under Iso  
3 anaesthesia, supporting our results that fALFF in the hypothalamus, including the POA, increased both under  
4 Iso and under Iso + Med anaesthesia<sup>47</sup>. Dexmedetomidine, an analogue of medetomidine, increased the delta  
5 frequency power of local field potentials in the cortex<sup>48</sup>. This finding can explain why fALFF in the cerebral  
6 cortex partially increased under Iso + Med anaesthesia.

## 7 8 **Perspectives and Conclusions**

9 In the present study, we demonstrated alterations in static FC and dynamic FC under two types of  
10 anaesthesia compared with the awake state. The typical structure of static FC was conserved under  
11 anaesthesia, although the strength of static FC decreased compared to that observed in the awake state. The  
12 dynamic property of the functional network shifted to regional connectivity within the cortex under an  
13 anaesthetized state. These results indicate that connectivity in the subcortex could be a marker of the  
14 anaesthetized state. These results provide insight into the alteration/non-alteration of neuronal networks  
15 under unconscious conditions.

## 16 17 **Acknowledgements**

18 We thank to Mr. Boucif Djemai for the support of MRI experiment.

## 19 20 **Funding sources**

21 This research in the laboratory of TT was supported by *Fondation de France* (grant number: 00086313) and  
22 *Grant-in-Aid for Research Activity Start-up* (grant number: 20K22698).

## 23 24 **CRediT authorship contribution statement**

25 **Tomokazu Tsurugizawa:** Conceptualization, Methodology, Investigation, Visualization, Writing - review &  
26 editing. **Daisuke Yoshimaru:** Methodology, Visualization, Writing - review & editing.

## 27 28 **Figure legends**

### 29 **Figure 1 Schematic figure of the experimental paradigm**

30 (A) Tube for Iso-anaesthesia is placed in front of the nose and catheter for Med injection was implanted  
31 under the back skin. The plastic bar was attached on the skull by dental cement was fixed by head positioner.  
32 (B) Schedule of experiment.

### 33 34 **Figure 2 Comparison of static FC among awake, Iso-anaesthetized and Iso + Med-anaesthetized states.**

35 (A) Averaged connectivity matrices in awake, Iso anaesthetized, Iso + Med anaesthetized conditions. (B left)  
36 Comparison of each ROI-ROI correlation coefficient between awake and Iso groups. The lower left shows  
37 the T-values, and the upper right shows the significant differences ( $p < 0.05$ , NBS-corrected). (B right)  
38 Figure showing significantly decreased connectivity in the Iso-anaesthetized state compared with the awake

1 state ( $p < 0.05$ , NBS-corrected). (C left) Comparison of each ROI-ROI correlation coefficient between the  
2 awake and Iso groups. The lower left shows the T-values, and the upper right shows the significant  
3 differences ( $p < 0.05$ , NBS-corrected). (C right) Figure showing significantly decreased connectivity in the  
4 Iso group compared with the Awake group.

5

6 **Figure 3. The similarity of functional brain connectivity among groups.**

7 A similarity matrix, where every cell represents the similarity of functional networks between different  
8 individuals. Rows and columns represent the similarity between a particular individual and all individuals,  
9 including other groups. The similarity matrix comprises the awake group ( $n = 9$ ), Iso group ( $n = 9$ ), and Iso +  
10 Med group ( $n = 9$ ). Colour bar, correlation coefficients.

11

12 **Figure 4. Widespread decrease in correlation coefficients under anaesthesia.**

13 (A) T-statistic values of each ROI-ROI correlation coefficient between awake and anaesthetized (combining  
14 Iso and Iso + Med anaesthesia) states. A positive t-value indicates higher correlation coefficients for the  
15 awake state than for the anaesthetized state. The upper right triangle shows the significant increase (yellow)  
16 or decrease (blue) (NBS-corrected). Colour bar, t-values. (B) Top twenty largest effect sizes of the ROI-ROI  
17 correlation coefficient. The effect sizes indicate a reduction in the correlation coefficient under the  
18 anaesthetized state. (C) Extent to which individual regions are affected by the network of reduced  
19 connectivity under anaesthetized conditions. The effect sizes were calculated across all connections  
20 associated with a given region. (D) A coefficient profile plot was created to visualize the cross-validated  
21 error of various levels of regularization. A vertical line was drawn at the value selected using leave-one-out  
22 cross-validation. The green circle and dotted line indicate the lambda with minimum cross-validation error.  
23 The blue circle and dotted line indicate the point with minimum cross-validation error plus one standard  
24 deviation. (E) The regulation parameter ( $\lambda$ ) for the LASSO model was selected, and the trace plot of LASSO  
25 fit was visualized. Each line represents a trace of the values for a single predictor variable. PAG,  
26 periaqueductal grey; ACC, anterior cingulate cortex, LSr, lateral septal nucleus; DMH, dorsomedial  
27 hypothalamus; Tea, temporal association areas; ECT, entorhinal area; AIp, posterior agranular insular cortex;  
28 AId, dorsal agranular insular cortex; AUDd, dorsal auditory cortex; AUDp, primary auditory cortex; PH(d)  
29 (dorsal) posterior hypothalamus; GU, gustatory cortex; ENTDL, dorsolateral entorhinal cortex; PRh,  
30 perirhinal cortex; PIR, piriform cortex; LHA, lateral hypothalamic area; MOs, secondary motor cortex; VAL,  
31 ventral anterior-lateral complex; VPM, ventral posteromedial nucleus; VPL, ventral posterolateral nucleus;  
32 PO, posterior complex; CM, centromedian nucleus; VM, ventromedial nucleus; LA, lateral amygdala; CEA,  
33 central amygdala; MPO, medial preoptic area; SSs, secondary somatosensory cortex. The r in the first letter  
34 indicates right hemisphere and no small first letter indicates the left hemisphere.

35

36 **Figure 5. Dynamic functional connectivity in awake, Iso anaesthetized and Iso + Med anaesthetized**  
37 **mice.**

38 (A) Four dynamic FC states. (B and C) Averaged dwell time (B) and frequency of occurrence (C) in each

1 state in the awake condition, under Iso anaesthesia and under Iso + Med anaesthesia. \* $p < 0.05$  compared with  
2 the awake condition in each state, Bonferroni-corrected. # $p < 0.05$  compared with the Iso condition in each  
3 state, Bonferroni-corrected.

4  
5 **Figure 6. fALFF in awake, Iso-anaesthetized and Iso + Med-anaesthetized mice.**

6 (A) Significant increase in fALFF (hot colour) and decrease in fALFF (blue colour) in the awake group  
7 compared with Iso group. (B) Significant increase in fALFF (hot colour) and decrease in fALFF (blue  
8 colour) in the awake group compared with Iso + Med group. (C) Significant increase in fALFF (hot colour)  
9 and decrease in fALFF (blue colour) in the awake group compared with the anaesthetized group.  $P < 0.05$ ,  
10 FDR-corrected. Colour bar T-value. ACC, anterior cingulate cortex; AUD, auditory cortex; ENT, entorhinal  
11 cortex; MPO, medial preoptic area; VM, ventromedial nucleus; MO, motor cortex; SSp, primary  
12 somatosensory cortex; SSs, secondary somatosensory cortex; VPL, ventral posterolateral nucleus; VPM,  
13 ventral posteromedial nucleus.

14  
15 **Supplementary Figure 1. Test-retest reproducibility and comparison of functional connectivity**  
16 **between anaesthetized states.**

17 (A) Averaged connectivity matrices in the first scan and second scan of awake groups. (B) Statistical  
18 significance of test-retest data. The lower left shows the T-values, and the upper right shows the significant  
19 differences ( $p < 0.05$ , NBS-corrected). (C) Comparison between Iso and Med groups. The lower left shows  
20 the T-values, and the upper right shows the significant differences ( $p < 0.05$ , NBS-corrected).

21  
22 **Supplementary Figure 2. Common ICA components in awake, Iso-anaesthetized and Iso +**  
23 **Med-anaesthetized states by group ICA based on 40 components.**

24 Common ICA components, default mode network (DMN), lateral cortical network (LCN), subcortical  
25 network (BG), hippocampus (Hip), thalamus (ThN), Hypothalamus (Hypo), auditory-visual cortical network  
26 (AUD-VIS) are overlaid on the representative mouse image.

27  
28 **Supplementary Figure 3. Comparison of fALFF between the anaesthetized state and fALFF of**  
29 **test-retest reproducibility of awake fMRI.**

30 (A) Significant increase in ALFF (hot colour) and decrease in ALFF (blue colour) in the Iso group compared  
31 with the Iso + Med group. (B) There was no significant increase in ALFF (hot colour) or decrease in ALFF  
32 (blue colour) between the first scan and second scan in the awake group.  $P < 0.05$ , FDR-corrected. Colour  
33 bar T-value.

34  
35 **References**

- 36  
37 1. Friston KJ. Functional and effective connectivity: a review. *Brain connectivity* **1**, 13-36 (2011).  
38

- 1 2. Alkire MT, Hudetz AG, Tononi G. Consciousness and anesthesia. *Science* **322**, 876-880 (2008).
- 2
- 3 3. Hudetz AG. General anesthesia and human brain connectivity. *Brain connectivity* **2**, 291-302 (2012).
- 4
- 5 4. Akeju O, *et al.* Disruption of thalamic functional connectivity is a neural correlate of  
6 dexmedetomidine-induced unconsciousness. *eLife* **3**, e04499 (2014).
- 7
- 8 5. Xu T, *et al.* Interindividual Variability of Functional Connectivity in Awake and Anesthetized Rhesus  
9 Macaque Monkeys. *Biological psychiatry Cognitive neuroscience and neuroimaging* **4**, 543-553  
10 (2019).
- 11
- 12 6. Desai M, *et al.* Mapping brain networks in awake mice using combined optical neural control and  
13 fMRI. *J Neurophysiol* **105**, 1393-1405 (2011).
- 14
- 15 7. Tsurugizawa T, *et al.* Awake functional MRI detects neural circuit dysfunction in a mouse model of  
16 autism. *Science advances* **6**, eaav4520 (2020).
- 17
- 18 8. Liu Y, *et al.* An open database of resting-state fMRI in awake rats. *Neuroimage* **220**, 117094 (2020).
- 19
- 20 9. Kitamura A, *et al.* Ingested d-Aspartate Facilitates the Functional Connectivity and Modifies  
21 Dendritic Spine Morphology in Rat Hippocampus. *Cereb Cortex* **29**, 2499-2508 (2019).
- 22
- 23 10. Tsurugizawa T, Uematsu A, Uneyama H, Torii K. Functional brain mapping of conscious rats during  
24 reward anticipation. *J Neurosci Methods* **206**, 132-137 (2012).
- 25
- 26 11. Paasonen J, Stenroos P, Salo RA, Kiviniemi V, Grohn O. Functional connectivity under six  
27 anesthesia protocols and the awake condition in rat brain. *Neuroimage* **172**, 9-20 (2018).
- 28
- 29 12. Bukhari Q, Schroeter A, Cole DM, Rudin M. Resting State fMRI in Mice Reveals Anesthesia  
30 Specific Signatures of Brain Functional Networks and Their Interactions. *Frontiers in neural circuits*  
31 **11**, 5 (2017).
- 32
- 33 13. Xie H, *et al.* Differential effects of anesthetics on resting state functional connectivity in the mouse.  
34 *J Cereb Blood Flow Metab* **40**, 875-884 (2020).
- 35
- 36 14. Grandjean J, *et al.* Common functional networks in the mouse brain revealed by multi-centre  
37 resting-state fMRI analysis. *Neuroimage* **205**, 116278 (2020).
- 38



- 1 15. Hutchison RM, *et al.* Dynamic functional connectivity: promise, issues, and interpretations.  
2 *Neuroimage* **80**, 360-378 (2013).  
3
- 4 16. Zhang J, *et al.* Neural, electrophysiological and anatomical basis of brain-network variability and its  
5 characteristic changes in mental disorders. *Brain* **139**, 2307-2321 (2016).  
6
- 7 17. Zhu H, *et al.* Abnormal Dynamic Functional Connectivity Associated With Subcortical Networks in  
8 Parkinson's Disease: A Temporal Variability Perspective. *Frontiers in neuroscience* **13**, 80 (2019).  
9
- 10 18. Preti MG, Bolton TA, Van De Ville D. The dynamic functional connectome: State-of-the-art and  
11 perspectives. *Neuroimage* **160**, 41-54 (2017).  
12
- 13 19. Barttfeld P, Uhrig L, Sitt JD, Sigman M, Jarraya B, Dehaene S. Signature of consciousness in the  
14 dynamics of resting-state brain activity. *Proc Natl Acad Sci U S A* **112**, 887-892 (2015).  
15
- 16 20. Liang Z, Liu X, Zhang N. Dynamic resting state functional connectivity in awake and anesthetized  
17 rodents. *Neuroimage* **104**, 89-99 (2015).  
18
- 19 21. Nakamura Y, *et al.* fMRI detects bilateral brain network activation following unilateral  
20 chemogenetic activation of direct striatal projection neurons. *Neuroimage* **220**, 117079 (2020).  
21
- 22 22. Yoshida K, *et al.* Physiological effects of a habituation procedure for functional MRI in awake mice  
23 using a cryogenic radiofrequency probe. *J Neurosci Methods* **274**, 38-48 (2016).  
24
- 25 23. Hurst JL, West RS. Taming anxiety in laboratory mice. *Nat Methods* **7**, 825-826 (2010).  
26
- 27 24. Power JD, Barnes KA, Snyder AZ, Schlaggar BL, Petersen SE. Spurious but systematic correlations  
28 in functional connectivity MRI networks arise from subject motion. *Neuroimage* **59**, 2142-2154  
29 (2012).  
30
- 31 25. Whitfield-Gabrieli S, Nieto-Castanon A. Conn: a functional connectivity toolbox for correlated and  
32 anticorrelated brain networks. *Brain connectivity* **2**, 125-141 (2012).  
33
- 34 26. Tibshirani R. Regression Shrinkage and Selection via the Lasso. *Journal of the Royal Statistical*  
35 *Society* **58**, 267-288 (1996).  
36
- 37 27. Wu TT, Chen YF, Hastie T, Sobel E, Lange K. Genome-wide association analysis by lasso penalized  
38 logistic regression. *Bioinformatics* **25**, 714-721 (2009).

- 1
- 2 28. Gratton C, *et al.* Functional Brain Networks Are Dominated by Stable Group and Individual Factors,  
3 Not Cognitive or Daily Variation. *Neuron* **98**, 439-452 e435 (2018).  
4
- 5 29. Bergmann E, Gofman X, Kavushansky A, Kahn I. Individual variability in functional connectivity  
6 architecture of the mouse brain. *Communications biology* **3**, 738 (2020).  
7
- 8 30. Tsurugizawa T, Djemai B, Zalesky A. The impact of fasting on resting state brain networks in mice.  
9 *Scientific reports* **9**, 2976 (2019).  
10
- 11 31. Zalesky A, Fornito A, Bullmore ET. Network-based statistic: identifying differences in brain  
12 networks. *Neuroimage* **53**, 1197-1207 (2010).  
13
- 14 32. Olsen KS, Henriksen L, Owen-Falkenberg A, Dige-Petersen H, Rosenorn J, Chraemmer-Jorgensen B.  
15 Effect of 1 or 2 MAC isoflurane with or without ketanserin on cerebral blood flow autoregulation in  
16 man. *British journal of anaesthesia* **72**, 66-71 (1994).  
17
- 18 33. Schummers J, Yu H, Sur M. Tuned responses of astrocytes and their influence on hemodynamic  
19 signals in the visual cortex. *Science* **320**, 1638-1643 (2008).  
20
- 21 34. Newberg LA, Milde JH, Michenfelder JD. The cerebral metabolic effects of isoflurane at and above  
22 concentrations that suppress cortical electrical activity. *Anesthesiology* **59**, 23-28 (1983).  
23
- 24 35. Tsurugizawa T, Takahashi Y, Kato F. Distinct effects of isoflurane on basal BOLD signals in  
25 tissue/vascular microstructures in rats. *Scientific reports* **6**, 38977 (2016).  
26
- 27 36. Bukhari Q, Schroeter A, Rudin M. Increasing isoflurane dose reduces homotopic correlation and  
28 functional segregation of brain networks in mice as revealed by resting-state fMRI. *Scientific reports*  
29 **8**, 10591 (2018).  
30
- 31 37. Jonckers E, Delgado y Palacios R, Shah D, Guglielmetti C, Verhoye M, Van der Linden A. Different  
32 anesthesia regimes modulate the functional connectivity outcome in mice. *Magn Reson Med* **72**,  
33 1103-1112 (2014).  
34
- 35 38. Mhuirheartaigh RN, Rosenorn-Lanng D, Wise R, Jbabdi S, Rogers R, Tracey I. Cortical and  
36 subcortical connectivity changes during decreasing levels of consciousness in humans: a functional  
37 magnetic resonance imaging study using propofol. *J Neurosci* **30**, 9095-9102 (2010).  
38

- 1 39. Ranft A, *et al.* Neural Correlates of Sevoflurane-induced Unconsciousness Identified by  
2 Simultaneous Functional Magnetic Resonance Imaging and Electroencephalography. *Anesthesiology*  
3 **125**, 861-872 (2016).  
4
- 5 40. Michel M. A role for the anterior insular cortex in the global neuronal workspace model of  
6 consciousness. *Consciousness and cognition* **49**, 333-346 (2017).  
7
- 8 41. Menon SS, Krishnamurthy K. A Comparison of Static and Dynamic Functional Connectivities for  
9 Identifying Subjects and Biological Sex Using Intrinsic Individual Brain Connectivity. *Scientific*  
10 *reports* **9**, 5729 (2019).  
11
- 12 42. Grandjean J, *et al.* Dynamic reorganization of intrinsic functional networks in the mouse brain.  
13 *Neuroimage* **152**, 497-508 (2017).  
14
- 15 43. Abe Y, Tsurugizawa T, Le Bihan D. Water diffusion closely reveals neural activity status in rat brain  
16 loci affected by anesthesia. *PLoS biology* **15**, e2001494 (2017).  
17
- 18 44. Timic Stamenic T, Feseha S, Valdez R, Zhao W, Klawitter J, Todorovic SM. Alterations in  
19 Oscillatory Behavior of Central Medial Thalamic Neurons Demonstrate a Key Role of CaV3.1  
20 Isoform of T-Channels During Isoflurane-Induced Anesthesia. *Cereb Cortex* **29**, 4679-4696 (2019).  
21
- 22 45. Pertovaara A, Bravo R, Herdegen T. Induction and suppression of immediate-early genes in the rat  
23 brain by a selective alpha-2-adrenoceptor agonist and antagonist following noxious peripheral  
24 stimulation. *Neuroscience* **54**, 117-126 (1993).  
25
- 26 46. Scheinin M, *et al.* Distribution of alpha 2-adrenergic receptor subtype gene expression in rat brain.  
27 *Brain Res Mol Brain Res* **21**, 133-149 (1994).  
28
- 29 47. Park TY, *et al.* Effects of isoflurane anesthesia and intravenous morphine self-administration on  
30 regional glucose metabolism ([<sup>18</sup>F]FDG-PET) of male Sprague-Dawley rats. *Eur J Neurosci* **45**,  
31 922-931 (2017).  
32
- 33 48. Fukuda M, Vazquez AL, Zong X, Kim SG. Effects of the alpha(2)-adrenergic receptor agonist  
34 dexmedetomidine on neural, vascular and BOLD fMRI responses in the somatosensory cortex. *Eur J*  
35 *Neurosci* **37**, 80-95 (2013).  
36  
37  
38

A

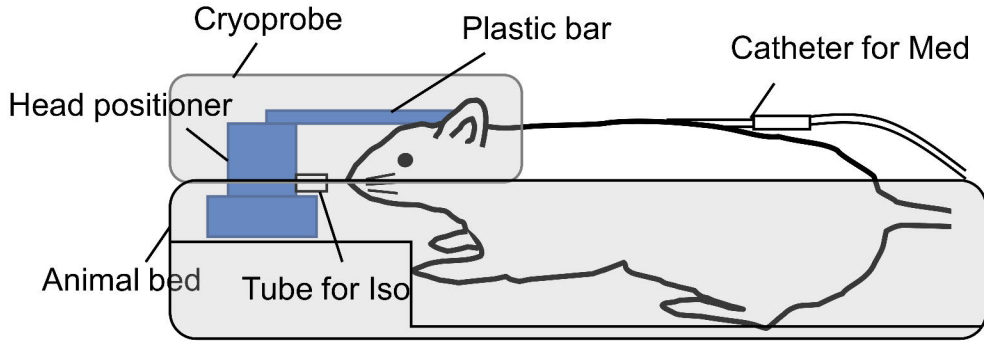

B

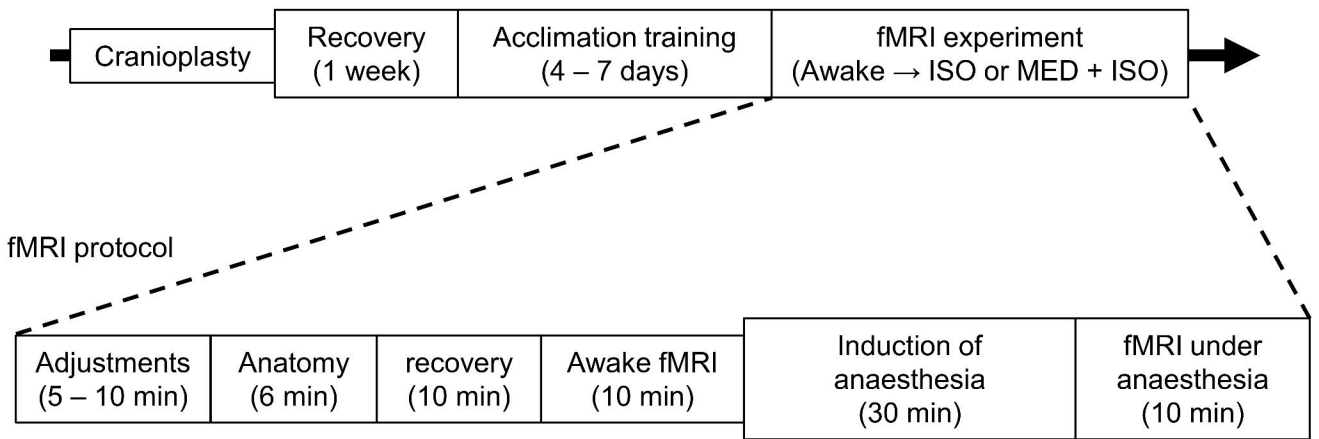

Figure 1

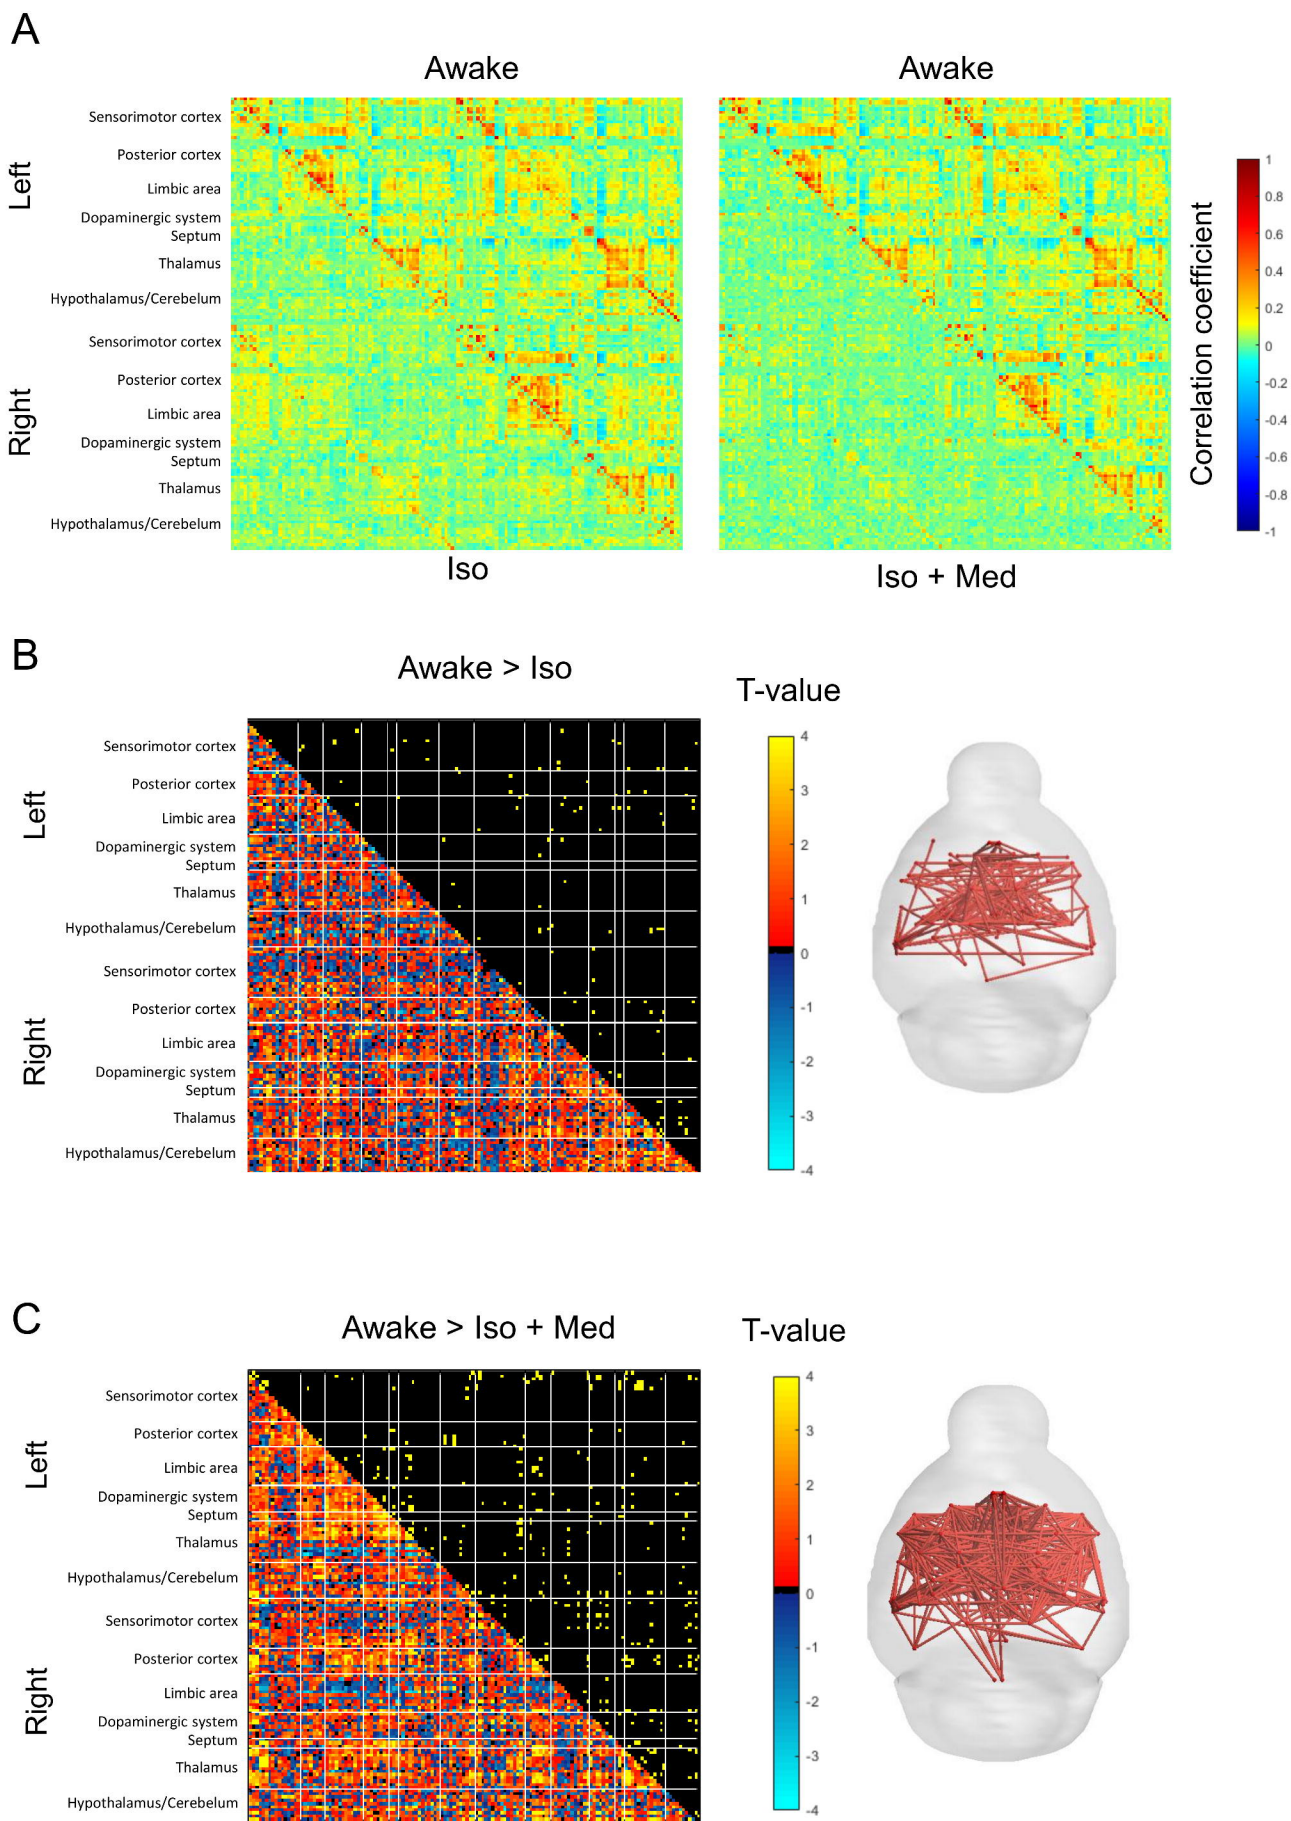

Figure 2

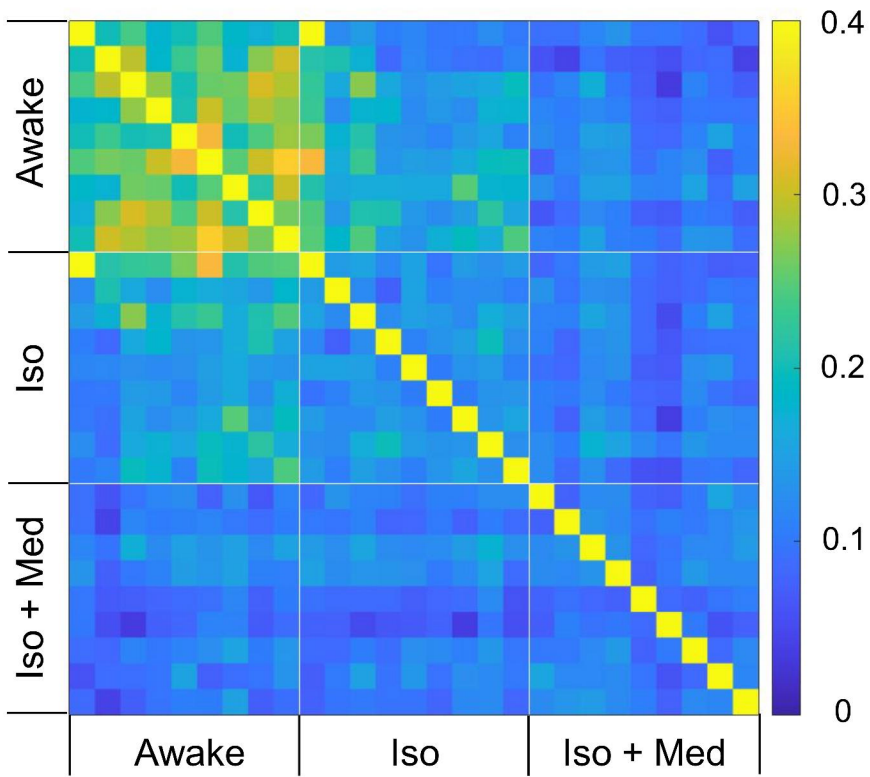

Figure 3

A

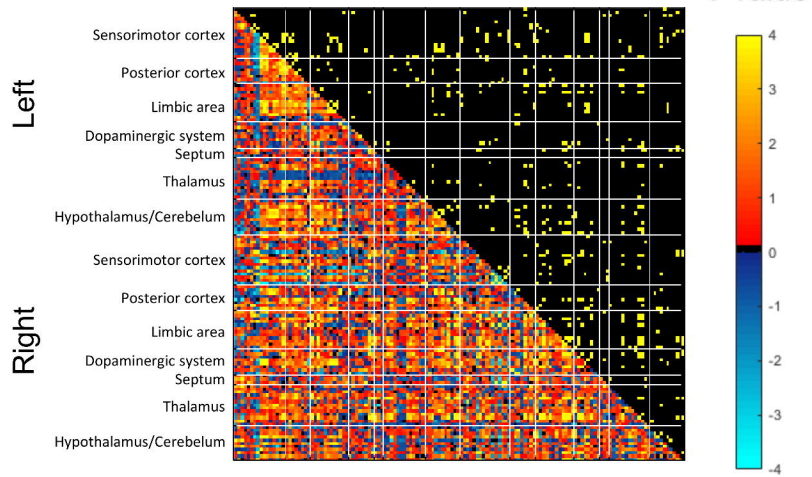

B

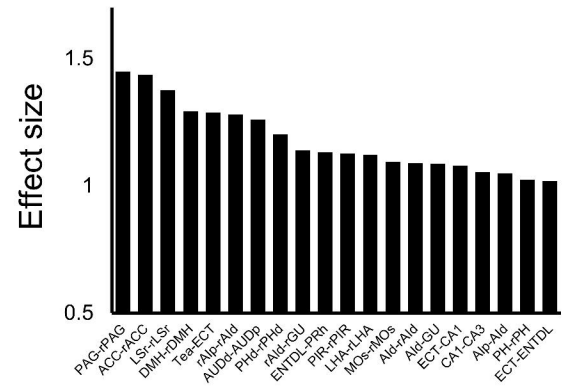

C

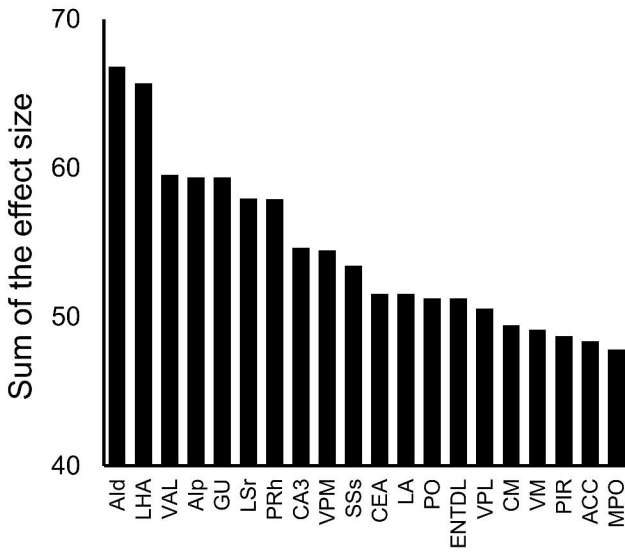

D

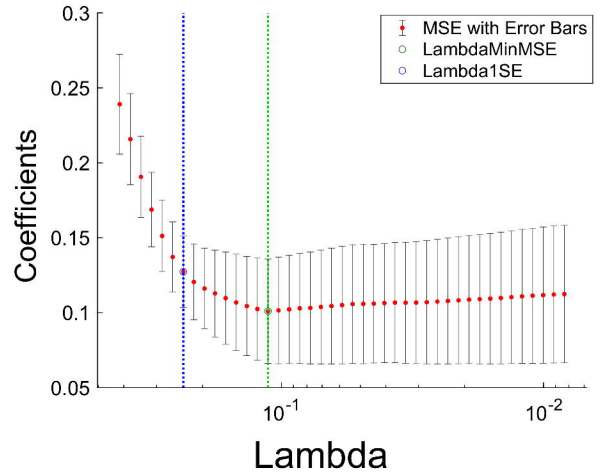

E

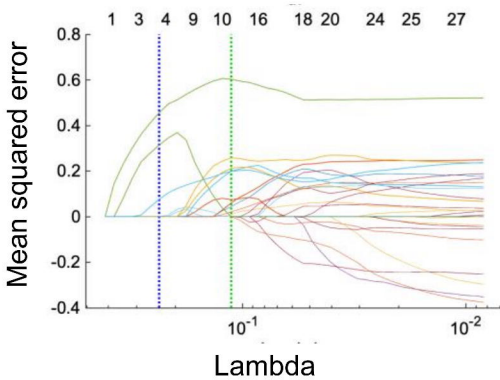

Figure 4

A

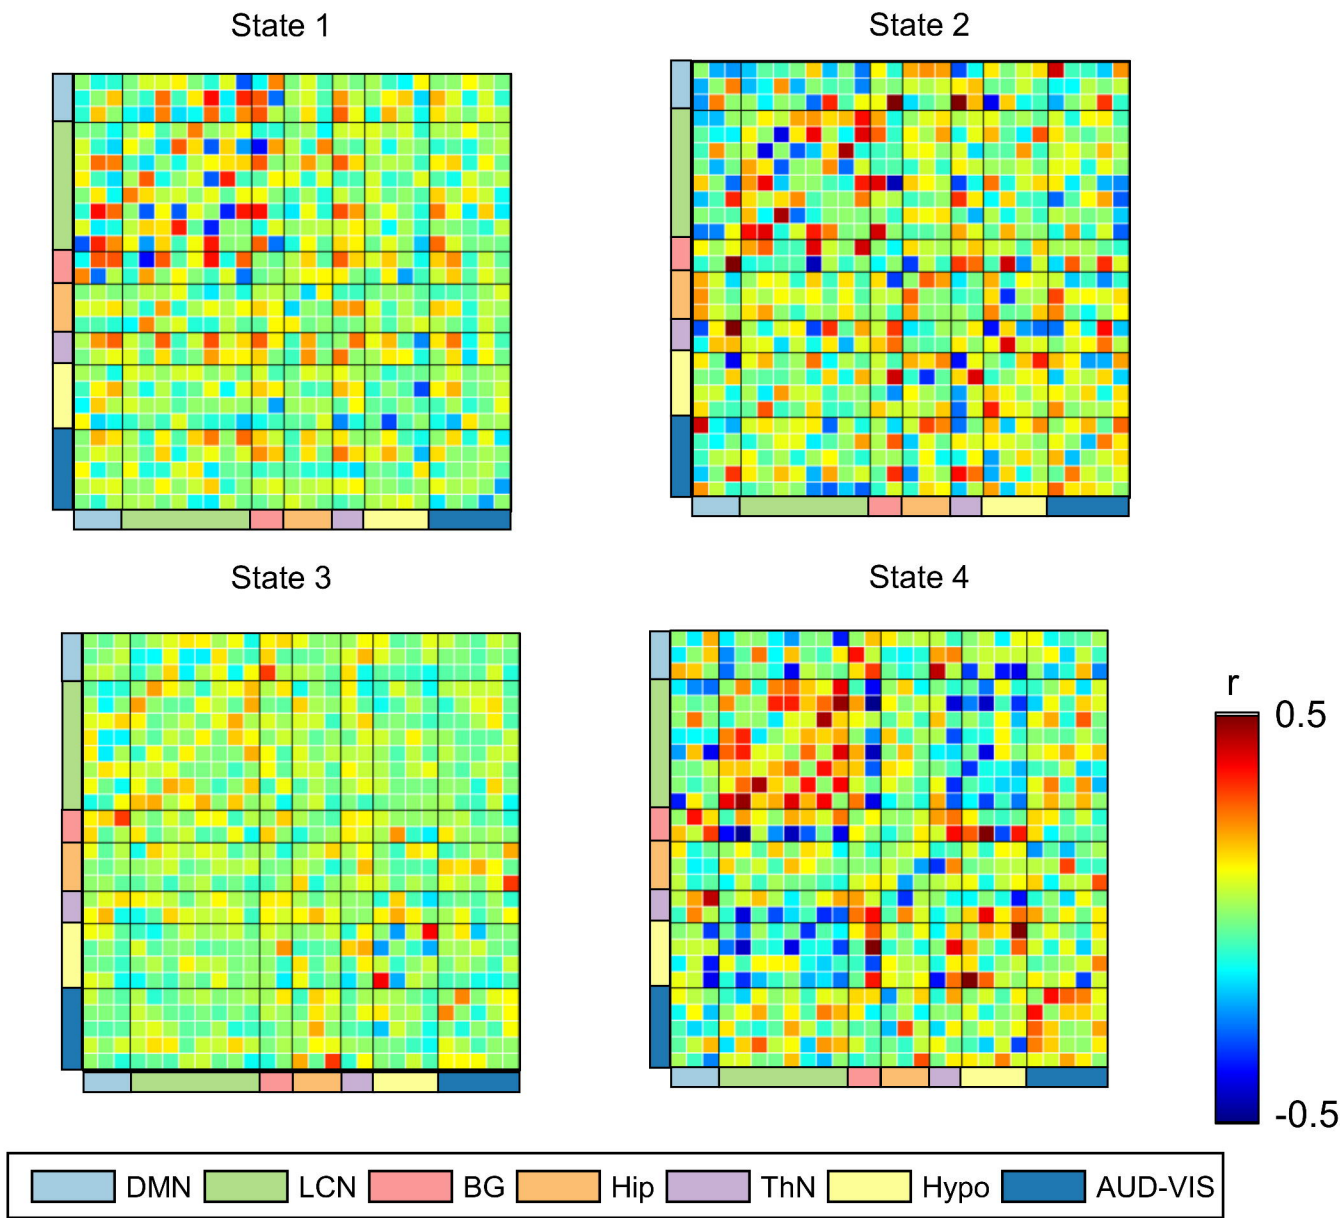

B

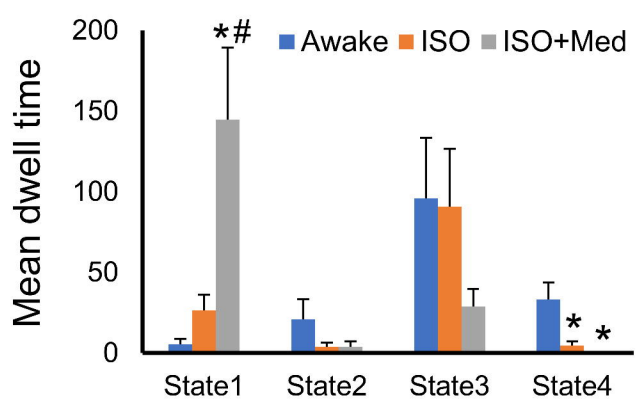

C

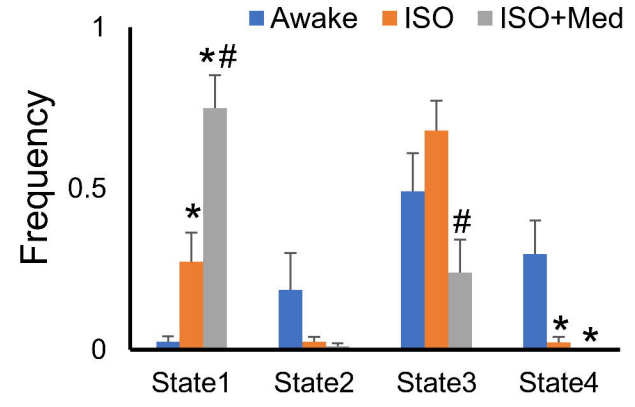

Figure 5



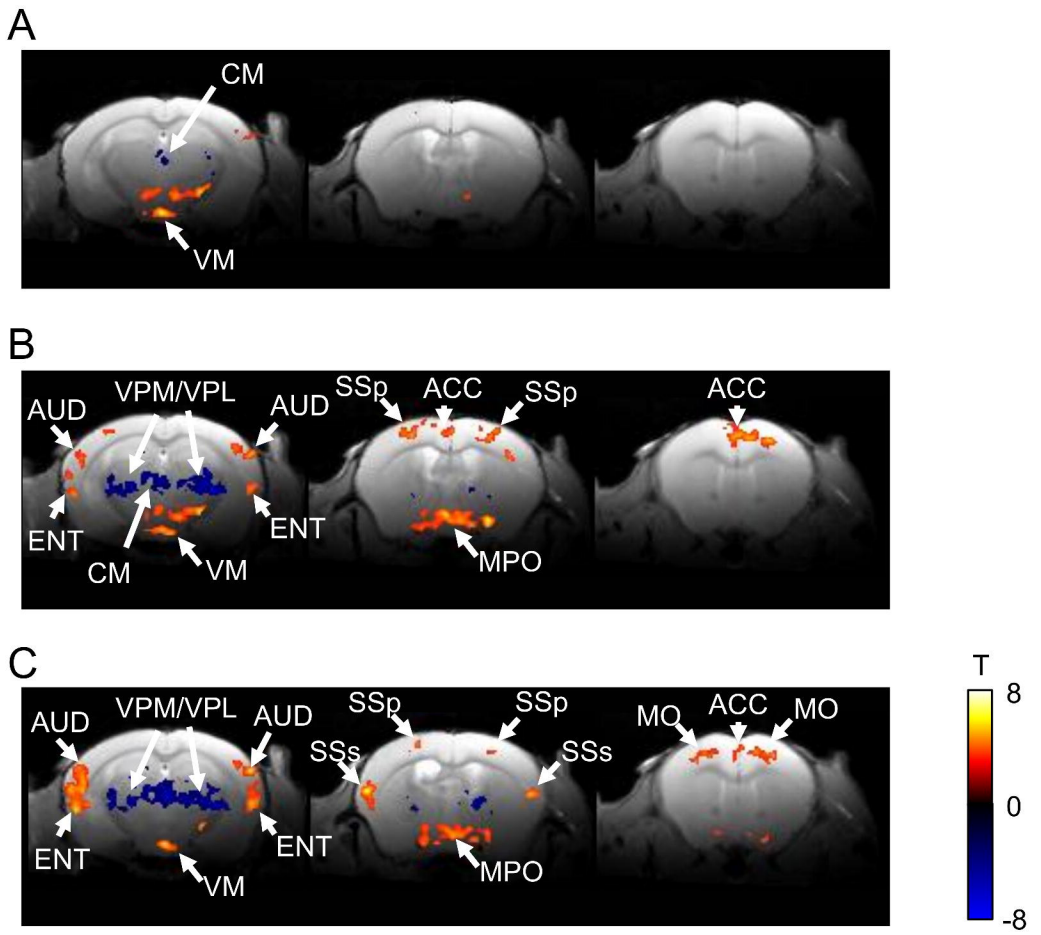

Figure 6
